# Supplementary material for: Uncovering a Distinct Gene Signature in Endothelial Cells Associated With Contrast Enhancement in Glioblastoma
Source: PubMed Central journal article supplement (PMC8245778; doi:10.3389/fonc.2021.683367), 2021-06-17

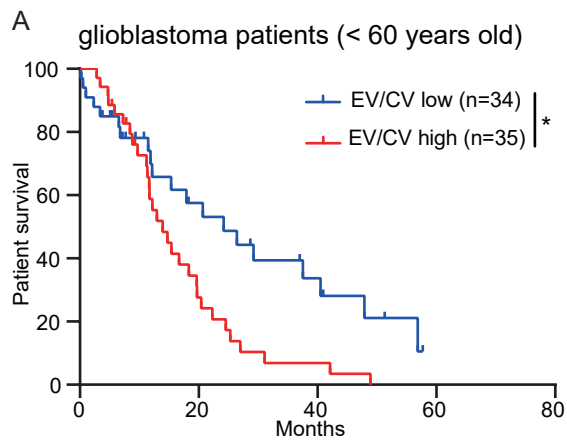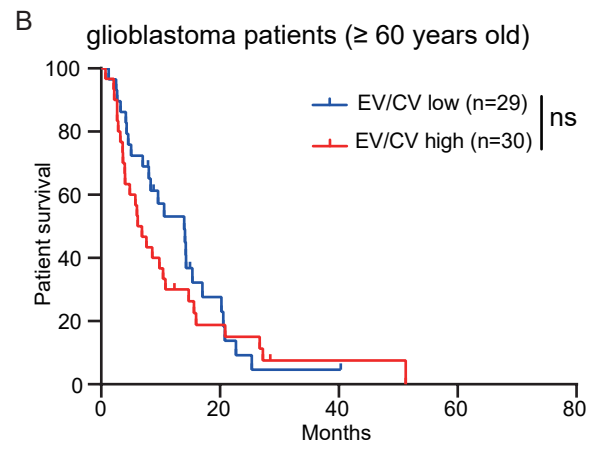

Supplement: Image_1.pdf [file Image_1.pdf]
